# Supplementary material for: Rapid and Consistent Improvements in Morning PEF in Patients with Severe Eosinophilic Asthma Treated with Mepolizumab
Source: Springer Nature journal article supplement (doi:10.1007/s12325-018-0727-8), 2018-06-15

# Rapid and Consistent Improvements in Morning PEF in Patients with Severe Eosinophilic Asthma Treated with Mepolizumab

## Supplementary material

### Supplementary figure legend

Figure S1. Percent change in AM PEF (L/min) in the combined MENSA and MUSCA Studies

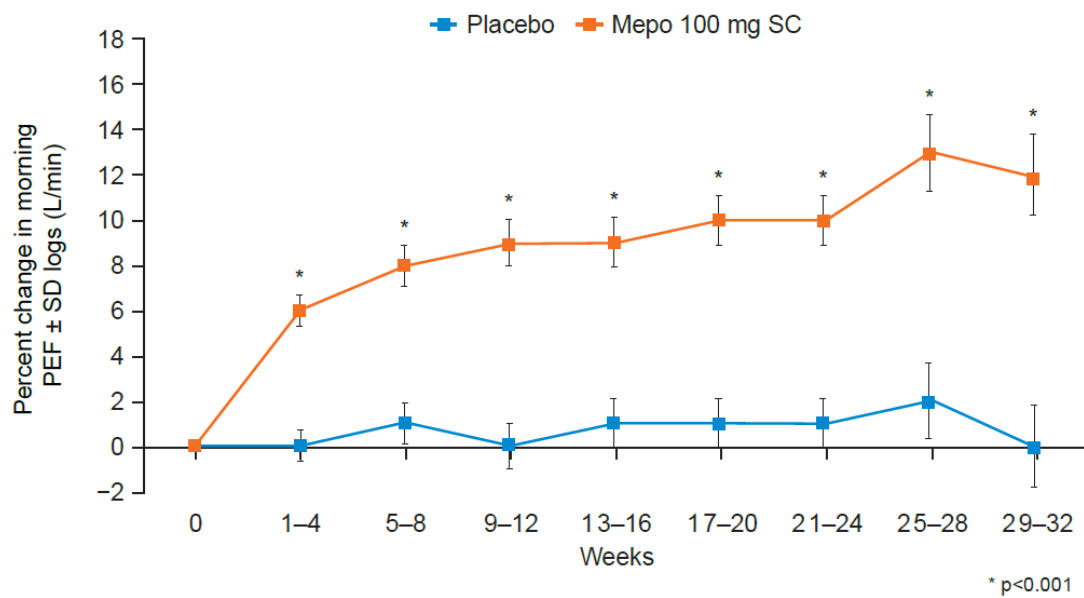

Supplement: MOESM1 [file 15848760]
